# Supplementary material for: Co-crystal formation vs. boron coordination: fluorination in azopyridines regulates supramolecular competition
Source: Royal Society of Chemistry journal article supplement (doi:10.1039/d4ce00611a), 2024-01-01
Supplement: d4ce00611a1.pdf [file d4ce00611a1.pdf]

## Electronic Supplementary Information (ESI)

# Co-crystal Formation vs. Boron Coordination: Fluorination in Azopyridines Regulates Supramolecular Competition

Jesus Daniel Loya,<sup>a,†</sup> Sidhaesh A. Agarwal,<sup>a,†</sup> Nicholas Lutz,<sup>a</sup> Eric W. Reinheimer,<sup>b</sup> and  
Gonzalo Campillo-Alvarado<sup>a,\*</sup>

<sup>a</sup>Department of Chemistry, Reed College, Portland, OR 97202, USA.

<sup>b</sup>Rigaku Oxford Diffraction, The Woodlands, Texas, 77381, USA

<sup>†</sup>These authors contributed equally.

\*e-mail: gcampillo@reed.edu

### Table of Contents:

- S1) Experimental information
- S2) Single-crystal X-ray data
- S3) Powder X-ray data and phase analysis
- S4) NMR Spectra
- S5) Hirshfeld analysis

## S1. Experimental information

### Materials:

3-Fluoro-4-aminopyridine, 3,5-difluoro-4-aminopyridine, 2,3,5,6-tetrafluoro-4-aminopyridine, 4,4'-azopyridine, phenylboronic acid were obtained from AmBeed. Catechol was purchased from TCI. Acetonitrile, dichloromethane (DCM), deuterated water (D<sub>2</sub>O), MgSO<sub>4</sub>, and sodium hypochlorite solution were obtained from Sigma-Aldrich. All reagents and solvent were used as received.

### General synthetic method of azopyridines:

The synthetic procedure was adapted from the literature.<sup>1</sup> A fluorinated aminopyridine (500 mg) was dissolved in D<sub>2</sub>O (100 mL) to which 40 mL cold sodium hypochlorite solution was added dropwise with vigorous stirring at 0 °C affording a deep yellow solution. The aqueous layer was extracted with DCM (3 x 100 mL). The resulting solution was dried over MgSO<sub>4</sub> and filtered. The filtrate was concentrated to produce crystalline solids.

**Synthesis of diF-azop:** 3-fluoro-4-aminopyridine was reacted using the general synthetic method of azopyridines to afford **diF-azop** as a red solid. Recrystallization in acetonitrile afforded single crystals as black planks (210.3 mg, 42.8 %). <sup>1</sup>H NMR (400 MHz, CDCl<sub>3</sub>) δ 8.80 (d, *J* = 2.0 Hz, 2H), 8.61 (d, *J* = 5.0 Hz, 2H), 7.59 (t, *J* = 5.7 Hz, 2H) ppm; <sup>19</sup>F NMR (376 MHz, CDCl<sub>3</sub>) δ -138 (s, 2F) ppm; <sup>19</sup>F NMR spectrum showed traces of the *cis* isomer.

**Synthesis of tetraF-azop:** 3,5-difluoro-4-aminopyridine was reacted using the general synthetic method of azopyridines to afford **tetraF-azop** as a red solid. Recrystallization in acetonitrile afforded single crystals in the form of black blocks (279.80 mg, 56.8 %). <sup>1</sup>H NMR (400 MHz, CDCl<sub>3</sub>) δ 8.54 (m, 4H) ppm; <sup>19</sup>F NMR (376 MHz, CDCl<sub>3</sub>) δ -137 (s, 4F) ppm. <sup>19</sup>F NMR showed the presence of *cis:trans* isomers (ratio: 17:83).

**Synthesis of perF-azop:** 2,3,5,6-tetrafluoro-4-aminopyridine was reacted using an adapted procedure using 500 mL of D<sub>2</sub>O rather than 100 mL. **perF-azop** was isolated as a red solid. Single crystals in the form of red irregular planks were obtained after rotary evaporation (140.00 mg, 28.3%). <sup>19</sup>F NMR (376 MHz, CDCl<sub>3</sub>) δ -87 (m, 2F), -150 (m, 2F) ppm. Note: <sup>19</sup>F NMR showed the presence of *cis:trans* isomers (ratio: 17:83).

### General synthetic method of adducts

Azopyridine (**azop**, **diF-azop**, **tetraF-azop**) (0.015 mmol) was combined with phenylboronic acid (**PhBA**, 0.30 mmol) and catechol (**cat**, 0.30 mmol) in acetonitrile (3 mL). The solutions were gently heated until the solids fully dissolved. Single crystals of the adducts (**PhBE**)·(**diF-azop**), (**PhBE**)·(**tetraF-azop**) were observed after three days of

slow evaporation. For the case of **(PhBE)·(azop)**, the vial containing the solution was sealed, and single crystals were observed after three days under 4 °C.

Synthesis of **(PhBE)·(perF-azop)**: **perF-azop** (0.015 mmol) was combined with **PhBA** (0.15 mmol) and **cat**, (0.15 mmol) in acetonitrile (3 mL). The solution was gently heated until the solids fully dissolved. Single crystals of **(PhBE)·(perF-azop)** were observed after three days of slow evaporation. Initial attempts using **perF-azop** (0.015 mmol) with **PhBA** (0.30 mmol) and **cat** (0.30 mmol) afforded crystals of **(PhBE)·(perF-azop)** with the presence of crystal of pure **PhBE**.

We note adducts **(PhBE)·(azop)**, **(PhBE)·(diF-azop)**, and **(PhBE)·(tetraF-azop)** hydrolyze when dissolved in DMSO-*d*<sub>6</sub> into the corresponding azopyridine, catechol and phenylboronic acid

All the synthesized solids were protected from light in vials wrapped with aluminum foil. X-ray diffraction experiments were performed in an environment with minimum light.

#### **Instruments and methods:**

<sup>1</sup>H and <sup>19</sup>F NMR spectra were recorded on a Bruker Ascend Evo 400 MHz spectrometer with chloroform-*d*, DMSO-*d*<sub>6</sub> and TMS as internal standards. <sup>19</sup>F NMR experiments were decoupled. NMR data was processed with Mnova suite. Single crystal X-ray diffraction (SCXRD) data was collected on a Rigaku XtaLAB Mini II diffractometer with a CCD area detector ( $\lambda\text{MoK}\alpha = 0.71073 \text{ \AA}$ , monochromator: graphite). Experiments were conducted at 100 K with a range of  $2\theta = 3\text{-}62^\circ$ . The collected data was refined with CrysAlisPro through standard data reduction and background corrections (multi-scan was used for all samples). Crystals were mounted in Paratone oil on a Mitegen magnetic mount. Structure solution and refinement were performed using SHELXT<sup>2</sup> and SHELXL,<sup>3</sup> respectively within the Olex2<sup>4</sup> graphical user interface. All the hydrogen atoms were added in geometrically calculated positions using a riding model with appropriate AFIX instructions.

#### **Computational methods:**

Single point energy calculations at ground state in the gas phase were performed using the Spartan '20 graphical user interface using geometrical coordinates obtained from single crystal X-ray diffraction data. Density Functional Theory (DFT) was used with the  $\omega\text{B97X-D}$  exchange-correlation functional and correlated corrected basis set cc-pVTZ.<sup>5</sup> Electrostatic potential maps were computed and mapped using the isodensity surface 0.002 e/au<sup>3</sup> with medium resolution.

## S2. Single-crystal X-ray data

Table S1. Crystallographic parameters for (PhBE)·(azop)

|                                          |                                                                              |
|------------------------------------------|------------------------------------------------------------------------------|
| <b>Compound name</b>                     | (PhBE)·(azop)                                                                |
| <b>Empirical formula</b>                 | C <sub>34</sub> H <sub>26</sub> B <sub>2</sub> N <sub>4</sub> O <sub>4</sub> |
| <b>Formula weight</b>                    | 576.21                                                                       |
| <b>Temperature/K</b>                     | 99.9(6)                                                                      |
| <b>Crystal system</b>                    | monoclinic                                                                   |
| <b>Space group</b>                       | <i>P</i> 2 <sub>1</sub> / <i>c</i>                                           |
| <b>a/Å</b>                               | 6.8631(2)                                                                    |
| <b>b/Å</b>                               | 13.1490(3)                                                                   |
| <b>c/Å</b>                               | 15.7054(4)                                                                   |
| <b>α/°</b>                               | 90                                                                           |
| <b>β/°</b>                               | 99.615(3)                                                                    |
| <b>γ/°</b>                               | 90                                                                           |
| <b>Volume/Å<sup>3</sup></b>              | 1397.39(6)                                                                   |
| <b>Z</b>                                 | 2                                                                            |
| <b>ρ<sub>calc</sub>/g/cm<sup>3</sup></b> | 1.369                                                                        |
| <b>μ/mm<sup>-1</sup></b>                 | 0.090                                                                        |
| <b>F(000)</b>                            | 600.0                                                                        |
| <b>Crystal size/mm<sup>3</sup></b>       | 0.32 × 0.25 × 0.17                                                           |
| <b>Radiation</b>                         | Mo Kα (λ = 0.71073)                                                          |
| <b>2θ range for data collection/°</b>    | 4.064 to 61.294                                                              |
| <b>Index ranges</b>                      | -9 ≤ h ≤ 9, -17 ≤ k ≤ 18, -22 ≤ l ≤ 20                                       |
| <b>Reflections collected</b>             | 12564                                                                        |
| <b>Independent reflections</b>           | 4129 [R <sub>int</sub> = 0.0275, R <sub>sigma</sub> = 0.0320]                |
| <b>Data/restraints/parameters</b>        | 4129/15/222                                                                  |
| <b>Goodness-of-fit on F<sup>2</sup></b>  | 1.039                                                                        |
| <b>Final R indexes [I ≥ 2σ (I)]</b>      | R <sub>1</sub> = 0.0543, wR <sub>2</sub> = 0.1366                            |
| <b>Final R indexes [all data]</b>        | R <sub>1</sub> = 0.0669, wR <sub>2</sub> = 0.1442                            |
| <b>CCDC deposition number</b>            | 2347089                                                                      |

**Table S2.** Crystallographic parameters for **(PhBE)·(diF-azop)**

|                                          |                                                                                             |
|------------------------------------------|---------------------------------------------------------------------------------------------|
| <b>Compound name</b>                     | <b>(PhBE)·(diF-azop)</b>                                                                    |
| <b>Empirical formula</b>                 | C <sub>34</sub> H <sub>24</sub> B <sub>2</sub> F <sub>2</sub> N <sub>4</sub> O <sub>4</sub> |
| <b>Formula weight</b>                    | 612.19                                                                                      |
| <b>Temperature/K</b>                     | 99.9(6)                                                                                     |
| <b>Crystal system</b>                    | monoclinic                                                                                  |
| <b>Space group</b>                       | <i>P</i> 2 <sub>1</sub> / <i>c</i>                                                          |
| <b>a/Å</b>                               | 6.8710(3)                                                                                   |
| <b>b/Å</b>                               | 13.0541(6)                                                                                  |
| <b>c/Å</b>                               | 15.9373(7)                                                                                  |
| <b>α/°</b>                               | 90                                                                                          |
| <b>β/°</b>                               | 97.627(4)                                                                                   |
| <b>γ/°</b>                               | 90                                                                                          |
| <b>Volume/Å<sup>3</sup></b>              | 1416.86(11)                                                                                 |
| <b>Z</b>                                 | 2                                                                                           |
| <b>ρ<sub>calc</sub>/g/cm<sup>3</sup></b> | 1.435                                                                                       |
| <b>μ/mm<sup>-1</sup></b>                 | 0.103                                                                                       |
| <b>F(000)</b>                            | 632.0                                                                                       |
| <b>Crystal size/mm<sup>3</sup></b>       | 0.47 × 0.24 × 0.11                                                                          |
| <b>Radiation</b>                         | Mo Kα (λ = 0.71073)                                                                         |
| <b>2θ range for data collection/°</b>    | 4.048 to 49.996                                                                             |
| <b>Index ranges</b>                      | -8 ≤ h ≤ 8, -15 ≤ k ≤ 15, -14 ≤ l ≤ 18                                                      |
| <b>Reflections collected</b>             | 9101                                                                                        |
| <b>Independent reflections</b>           | 2494 [R <sub>int</sub> = 0.0788, R <sub>sigma</sub> = 0.0636]                               |
| <b>Data/restraints/parameters</b>        | 2494/0/208                                                                                  |
| <b>Goodness-of-fit on F<sup>2</sup></b>  | 1.049                                                                                       |
| <b>Final R indexes [I ≥ 2σ (I)]</b>      | R <sub>1</sub> = 0.0508, wR <sub>2</sub> = 0.1356                                           |
| <b>Final R indexes [all data]</b>        | R <sub>1</sub> = 0.0637, wR <sub>2</sub> = 0.1436                                           |
| <b>CCDC deposition number</b>            | 2347091                                                                                     |

**Table S3.** Crystallographic parameters for **(PhBE)·(tetraF-azop)**

|                                          |                                                                                             |
|------------------------------------------|---------------------------------------------------------------------------------------------|
| <b>Compound name</b>                     | <b>(PhBE)·(tetraF-azop)</b>                                                                 |
| <b>Empirical formula</b>                 | C <sub>34</sub> H <sub>22</sub> B <sub>2</sub> F <sub>4</sub> N <sub>4</sub> O <sub>4</sub> |
| <b>Formula weight</b>                    | 648.17                                                                                      |
| <b>Temperature/K</b>                     | 100.00(6)                                                                                   |
| <b>Crystal system</b>                    | monoclinic                                                                                  |
| <b>Space group</b>                       | <i>P</i> 2 <sub>1</sub> / <i>c</i>                                                          |
| <b>a/Å</b>                               | 7.0434(4)                                                                                   |
| <b>b/Å</b>                               | 12.8068(7)                                                                                  |
| <b>c/Å</b>                               | 16.0013(9)                                                                                  |
| <b>α/°</b>                               | 90                                                                                          |
| <b>β/°</b>                               | 98.123(5)                                                                                   |
| <b>γ/°</b>                               | 90                                                                                          |
| <b>Volume/Å<sup>3</sup></b>              | 1428.89(14)                                                                                 |
| <b>Z</b>                                 | 2                                                                                           |
| <b>ρ<sub>calc</sub>/g/cm<sup>3</sup></b> | 1.507                                                                                       |
| <b>μ/mm<sup>-1</sup></b>                 | 0.117                                                                                       |
| <b>F(000)</b>                            | 664.0                                                                                       |
| <b>Crystal size/mm<sup>3</sup></b>       | 0.19 × 0.13 × 0.09                                                                          |
| <b>Radiation</b>                         | Mo Kα (λ = 0.71073)                                                                         |
| <b>2θ range for data collection/°</b>    | 4.09 to 49.992                                                                              |
| <b>Index ranges</b>                      | -8 ≤ h ≤ 8, -15 ≤ k ≤ 15, -19 ≤ l ≤ 19                                                      |
| <b>Reflections collected</b>             | 9008                                                                                        |
| <b>Independent reflections</b>           | 2526 [R <sub>int</sub> = 0.0747, R <sub>sigma</sub> = 0.0815]                               |
| <b>Data/restraints/parameters</b>        | 2526/0/217                                                                                  |
| <b>Goodness-of-fit on F<sup>2</sup></b>  | 0.978                                                                                       |
| <b>Final R indexes [I ≥ 2σ (I)]</b>      | R <sub>1</sub> = 0.0446, wR <sub>2</sub> = 0.0997                                           |
| <b>Final R indexes [all data]</b>        | R <sub>1</sub> = 0.0755, wR <sub>2</sub> = 0.1104                                           |
| <b>CDCC deposition number</b>            | 2347088                                                                                     |

**Table S4.** Crystallographic parameters for (PhBE)·(perF-azop)

|                                          |                                                                              |
|------------------------------------------|------------------------------------------------------------------------------|
| <b>Compound name</b>                     | <b>(PhBE)·(perF-azop)</b>                                                    |
| <b>Empirical formula</b>                 | C <sub>22</sub> H <sub>9</sub> BF <sub>8</sub> N <sub>4</sub> O <sub>2</sub> |
| <b>Formula weight</b>                    | 524.14                                                                       |
| <b>Temperature/K</b>                     | 99.9(5)                                                                      |
| <b>Crystal system</b>                    | triclinic                                                                    |
| <b>Space group</b>                       | <i>P</i> -1                                                                  |
| <b>a/Å</b>                               | 6.2144(12)                                                                   |
| <b>b/Å</b>                               | 7.2948(13)                                                                   |
| <b>c/Å</b>                               | 11.7785(17)                                                                  |
| <b>α/°</b>                               | 81.392(13)                                                                   |
| <b>β/°</b>                               | 77.890(15)                                                                   |
| <b>γ/°</b>                               | 85.140(16)                                                                   |
| <b>Volume/Å<sup>3</sup></b>              | 515.41(16)                                                                   |
| <b>Z</b>                                 | 1                                                                            |
| <b>ρ<sub>calc</sub>/g/cm<sup>3</sup></b> | 1.689                                                                        |
| <b>μ/mm<sup>-1</sup></b>                 | 0.159                                                                        |
| <b>F(000)</b>                            | 262.0                                                                        |
| <b>Crystal size/mm<sup>3</sup></b>       | 0.552 × 0.161 × 0.089                                                        |
| <b>Radiation</b>                         | Mo Kα (λ = 0.71073)                                                          |
| <b>2θ range for data collection/°</b>    | 5.656 to 52.744                                                              |
| <b>Index ranges</b>                      | -7 ≤ h ≤ 7, -9 ≤ k ≤ 9, -14 ≤ l ≤ 14                                         |
| <b>Reflections collected</b>             | 6510                                                                         |
| <b>Independent reflections</b>           | 2083 [R <sub>int</sub> = 0.0498, R <sub>sigma</sub> = 0.0590]                |
| <b>Data/restraints/parameters</b>        | 2083/90/208                                                                  |
| <b>Goodness-of-fit on F<sup>2</sup></b>  | 1.013                                                                        |
| <b>Final R indexes [I ≥ 2σ (I)]</b>      | R <sub>1</sub> = 0.0544, wR <sub>2</sub> = 0.1403                            |
| <b>Final R indexes [all data]</b>        | R <sub>1</sub> = 0.0827, wR <sub>2</sub> = 0.1614                            |
| <b>CCDC deposition number</b>            | 2347087                                                                      |

**Table S5.** Crystallographic parameters for **diF-azop**

|                                         |                                                               |
|-----------------------------------------|---------------------------------------------------------------|
| <b>Compound name</b>                    | <b>diF-azop</b>                                               |
| <b>Empirical formula</b>                | C <sub>10</sub> H <sub>6</sub> F <sub>2</sub> N <sub>4</sub>  |
| <b>Formula weight</b>                   | 220.19                                                        |
| <b>Temperature/K</b>                    | 99.9(7)                                                       |
| <b>Crystal system</b>                   | orthorhombic                                                  |
| <b>Space group</b>                      | <i>Pbca</i>                                                   |
| <b>a/Å</b>                              | 6.6796(6)                                                     |
| <b>b/Å</b>                              | 12.6700(7)                                                    |
| <b>c/Å</b>                              | 22.3037(14)                                                   |
| <b>α/°</b>                              | 90                                                            |
| <b>β/°</b>                              | 90                                                            |
| <b>γ/°</b>                              | 90                                                            |
| <b>Volume/Å<sup>3</sup></b>             | 1887.6(2)                                                     |
| <b>Z</b>                                | 8                                                             |
| <b>ρ<sub>calc</sub>/cm<sup>3</sup></b>  | 1.550                                                         |
| <b>μ/mm<sup>-1</sup></b>                | 0.127                                                         |
| <b>F(000)</b>                           | 896.0                                                         |
| <b>Crystal size/mm<sup>3</sup></b>      | 0.267 × 0.072 × 0.063                                         |
| <b>Radiation</b>                        | Mo Kα (λ = 0.71073)                                           |
| <b>2θ range for data collection/°</b>   | 6.432 to 49.984                                               |
| <b>Index ranges</b>                     | -7 ≤ h ≤ 7, -14 ≤ k ≤ 13, -26 ≤ l ≤ 26                        |
| <b>Reflections collected</b>            | 13924                                                         |
| <b>Independent reflections</b>          | 1651 [R <sub>int</sub> = 0.0927, R <sub>sigma</sub> = 0.0674] |
| <b>Data/restraints/parameters</b>       | 1651/0/145                                                    |
| <b>Goodness-of-fit on F<sup>2</sup></b> | 0.958                                                         |
| <b>Final R indexes [I ≥ 2σ (I)]</b>     | R <sub>1</sub> = 0.0568, wR <sub>2</sub> = 0.1419             |
| <b>Final R indexes [all data]</b>       | R <sub>1</sub> = 0.0850, wR <sub>2</sub> = 0.1557             |
| <b>CCDC deposition number</b>           | 2347092                                                       |



**Table S6.** Crystallographic parameters for **tetraF-azop**

|                                          |                                                              |
|------------------------------------------|--------------------------------------------------------------|
| <b>Compound name</b>                     | <b>tetraF-azop</b>                                           |
| <b>Empirical formula</b>                 | C <sub>10</sub> H <sub>4</sub> F <sub>4</sub> N <sub>4</sub> |
| <b>Formula weight</b>                    | 256.17                                                       |
| <b>Temperature/K</b>                     | 99.9(7)                                                      |
| <b>Crystal system</b>                    | monoclinic                                                   |
| <b>Space group</b>                       | <i>P2<sub>1</sub>/c</i>                                      |
| <b>a/Å</b>                               | 5.0686(6)                                                    |
| <b>b/Å</b>                               | 5.1891(7)                                                    |
| <b>c/Å</b>                               | 18.590(2)                                                    |
| <b>α/°</b>                               | 90                                                           |
| <b>β/°</b>                               | 90.109(12)                                                   |
| <b>γ/°</b>                               | 90                                                           |
| <b>Volume/Å<sup>3</sup></b>              | 488.96(11)                                                   |
| <b>Z</b>                                 | 2                                                            |
| <b>ρ<sub>calc</sub>/g/cm<sup>3</sup></b> | 1.740                                                        |
| <b>μ/mm<sup>-1</sup></b>                 | 0.164                                                        |
| <b>F(000)</b>                            | 256.0                                                        |
| <b>Crystal size/mm<sup>3</sup></b>       | 0.54 × 0.5 × 0.05                                            |
| <b>Radiation</b>                         | Mo Kα (λ = 0.71073)                                          |
| <b>2θ range for data collection/°</b>    | 4.382 to 49.982                                              |
| <b>Index ranges</b>                      | -6 ≤ h ≤ 5, -6 ≤ k ≤ 6, -21 ≤ l ≤ 22                         |
| <b>Reflections collected</b>             | 2309                                                         |
| <b>Independent reflections</b>           | 848 [R <sub>int</sub> = 0.0390, R <sub>sigma</sub> = 0.0542] |
| <b>Data/restraints/parameters</b>        | 848/0/83                                                     |
| <b>Goodness-of-fit on F<sup>2</sup></b>  | 1.107                                                        |
| <b>Final R indexes [I ≥ 2σ (I)]</b>      | R <sub>1</sub> = 0.0478, wR <sub>2</sub> = 0.1287            |
| <b>Final R indexes [all data]</b>        | R <sub>1</sub> = 0.0565, wR <sub>2</sub> = 0.1351            |
| <b>CCDC deposition number</b>            | 2347090                                                      |

**Table S7.** Crystallographic parameters for **perF-azop**

|                                         |                                                              |
|-----------------------------------------|--------------------------------------------------------------|
| <b>Compound name</b>                    | <b>perF-azop</b>                                             |
| <b>Empirical formula</b>                | C <sub>10</sub> F <sub>8</sub> N <sub>4</sub>                |
| <b>Formula weight</b>                   | 328.14                                                       |
| <b>Temperature/K</b>                    | 100.15                                                       |
| <b>Crystal system</b>                   | monoclinic                                                   |
| <b>Space group</b>                      | <i>P2<sub>1</sub>/c</i>                                      |
| <b>a/Å</b>                              | 5.8251(6)                                                    |
| <b>b/Å</b>                              | 15.5339(18)                                                  |
| <b>c/Å</b>                              | 5.9792(8)                                                    |
| <b>α/°</b>                              | 90                                                           |
| <b>β/°</b>                              | 100.851(12)                                                  |
| <b>γ/°</b>                              | 90                                                           |
| <b>Volume/Å<sup>3</sup></b>             | 531.36(11)                                                   |
| <b>Z</b>                                | 2                                                            |
| <b>ρ<sub>calc</sub>/cm<sup>3</sup></b>  | 2.051                                                        |
| <b>μ/mm<sup>-1</sup></b>                | 0.228                                                        |
| <b>F(000)</b>                           | 320.0                                                        |
| <b>Crystal size/mm<sup>3</sup></b>      | 0.17 × 0.07 × 0.04                                           |
| <b>Radiation</b>                        | Mo Kα (λ = 0.71073)                                          |
| <b>2θ range for data collection/°</b>   | 5.244 to 49.984                                              |
| <b>Index ranges</b>                     | -6 ≤ h ≤ 6, -18 ≤ k ≤ 18, -7 ≤ l ≤ 7                         |
| <b>Reflections collected</b>            | 3070                                                         |
| <b>Independent reflections</b>          | 931 [R <sub>int</sub> = 0.0596, R <sub>sigma</sub> = 0.0889] |
| <b>Data/restraints/parameters</b>       | 931/0/100                                                    |
| <b>Goodness-of-fit on F<sup>2</sup></b> | 1.031                                                        |
| <b>Final R indexes [I &gt;= 2σ (I)]</b> | R <sub>1</sub> = 0.0517, wR <sub>2</sub> = 0.1036            |
| <b>Final R indexes [all data]</b>       | R <sub>1</sub> = 0.0998, wR <sub>2</sub> = 0.1206            |
| <b>CCDC deposition number</b>           | 2347086                                                      |

### S3. Powder X-ray Data and Phase Analysis

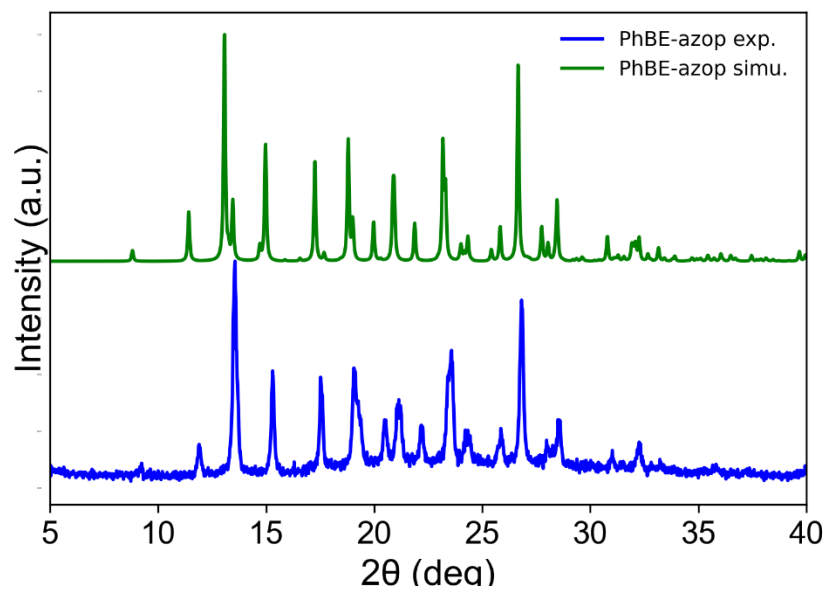

**Figure S1.** Powder X-ray diffractograms of **(PhBE)·(azop)** simulated from single crystal data (top) and experimental (bottom).

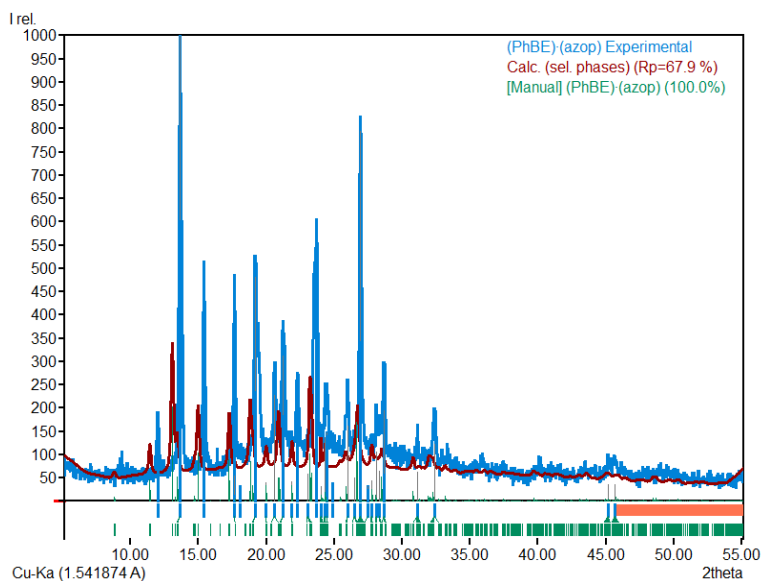

**Figure S2.** Phase composition analysis of **(PhBE)·(azop)** using experimental and simulated from single crystal data. Phase analysis was carried out using Match! software using profile fitting.<sup>6</sup>

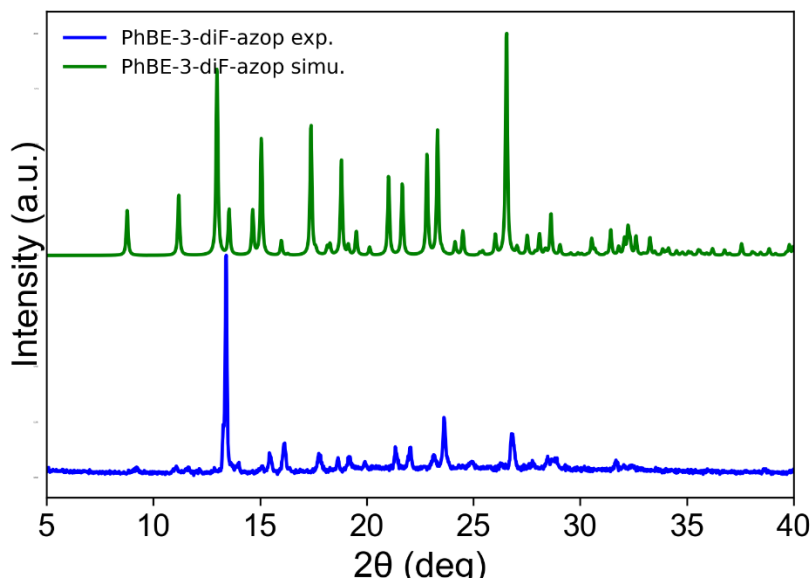

**Figure S3.** Powder X-ray diffractograms of **(PhBE)·(diF-azop)** simulated from single crystal data (top) and experimental (bottom).

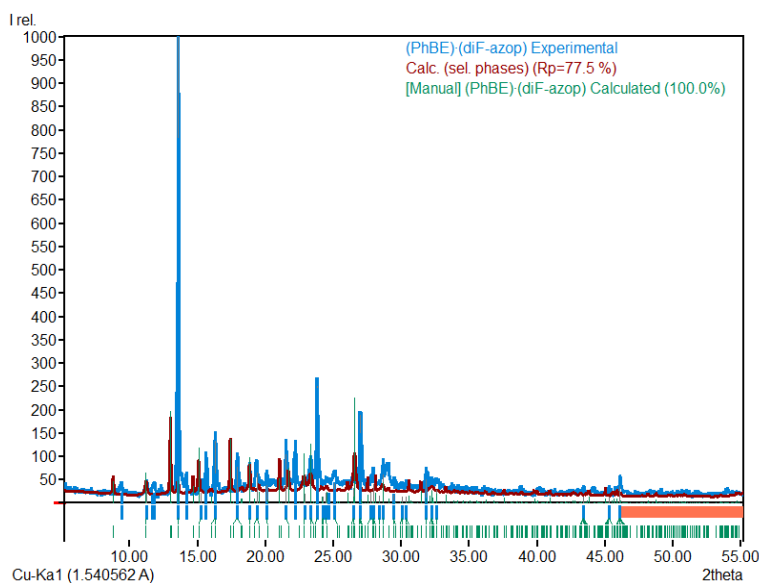

**Figure S4.** Phase composition analysis of **(PhBE)·(diFazop)** using experimental and simulated from single crystal data. Phase analysis was carried out using Match! software using profile fitting.<sup>6</sup>

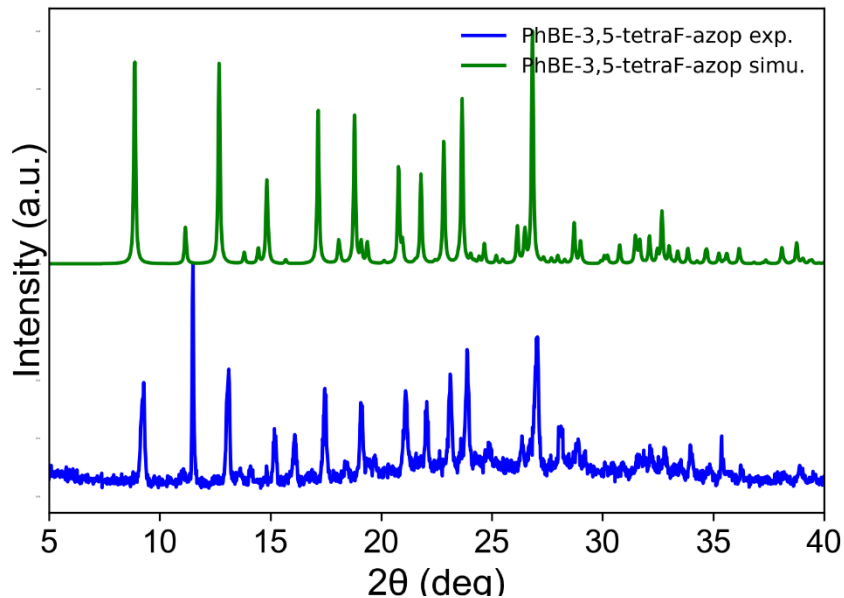

**Figure S5.** Powder X-ray diffractograms of  $(\text{PhBE}) \cdot (\text{tetraF-azop})$  simulated from single crystal data (top) and experimental (bottom).

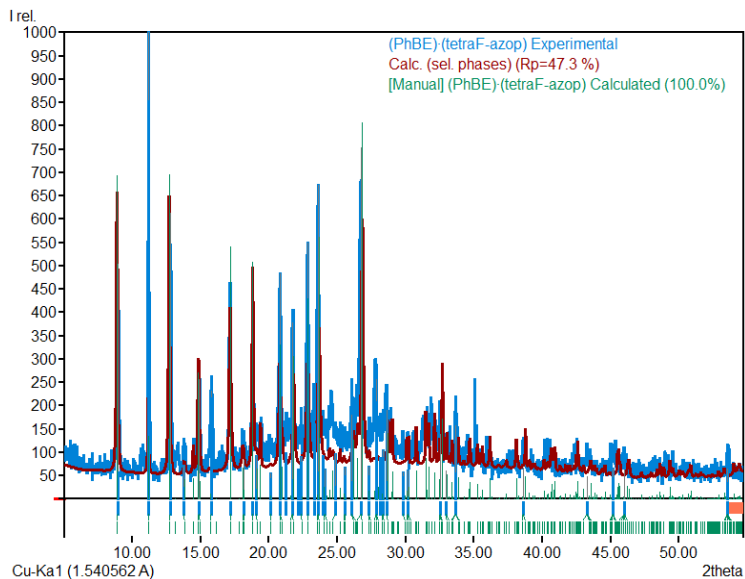

**Figure S6.** Phase composition analysis of  $(\text{PhBE}) \cdot (\text{tetraFazop})$  using experimental and simulated from single crystal data. Phase analysis was carried out using Match! software using profile fitting.<sup>6</sup>

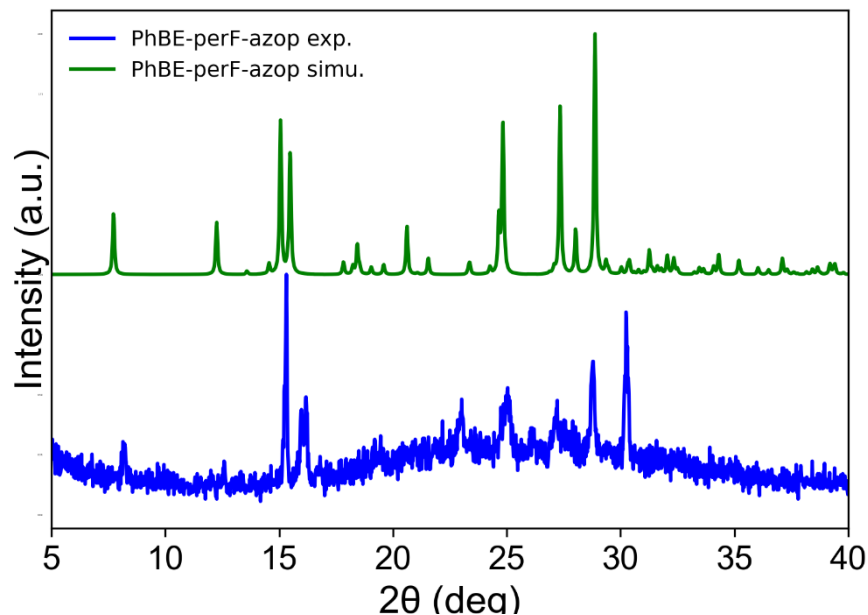

**Figure S7.** Powder X-ray diffractograms of **(PhBE)·(perF-azop)** simulated from single crystal data (top) and experimental (bottom).

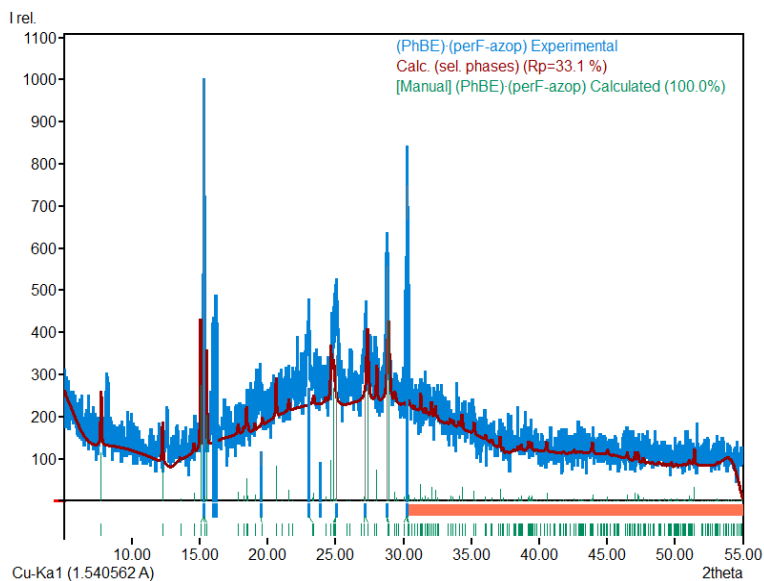

**Figure S8.** Phase composition analysis of **(PhBE)·(perFazop)** using experimental and simulated from single crystal data. Phase analysis was carried out using Match! software using profile fitting.<sup>6</sup>

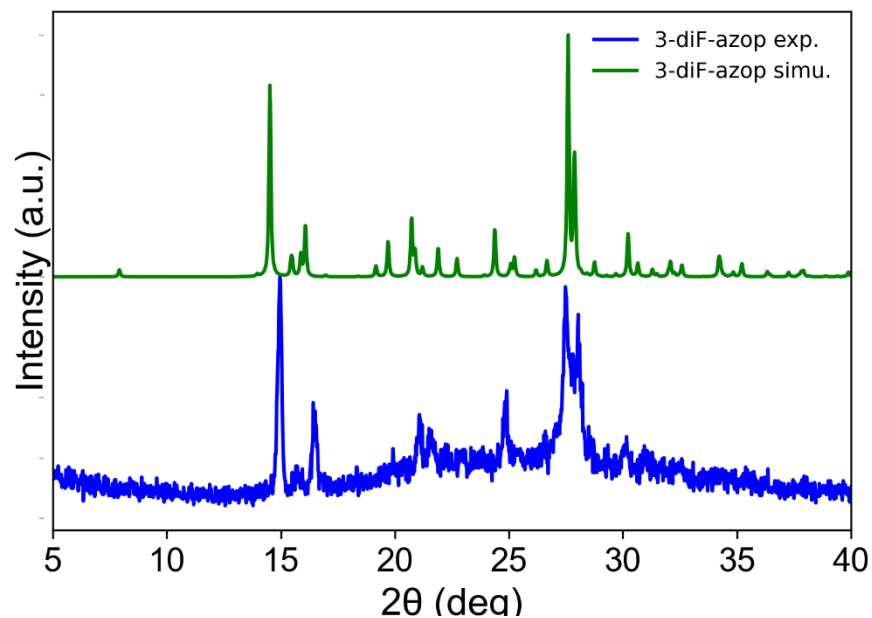

**Figure S9.** Powder X-ray diffractograms of **diF-azop** simulated from single crystal data (top) and experimental (bottom).

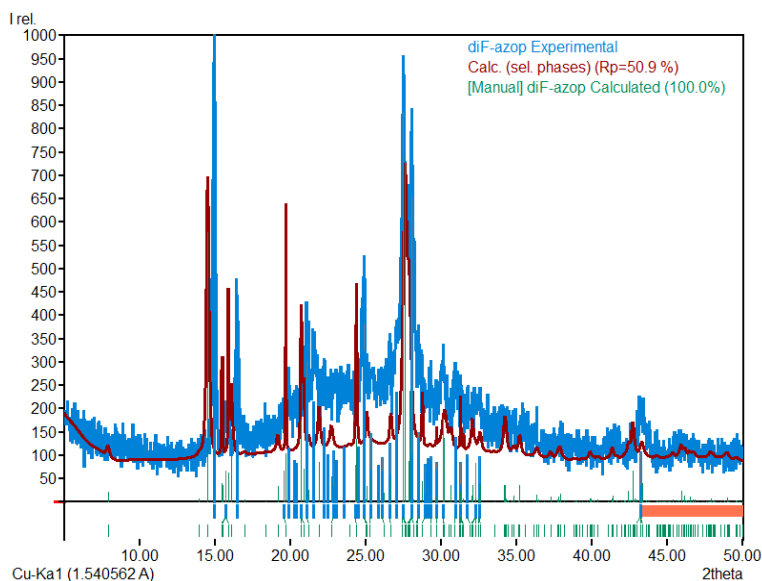

**Figure S10.** Phase composition analysis of **diFazop** using experimental and simulated from single crystal data. Phase analysis was carried out using Match! software using profile fitting.<sup>6</sup>

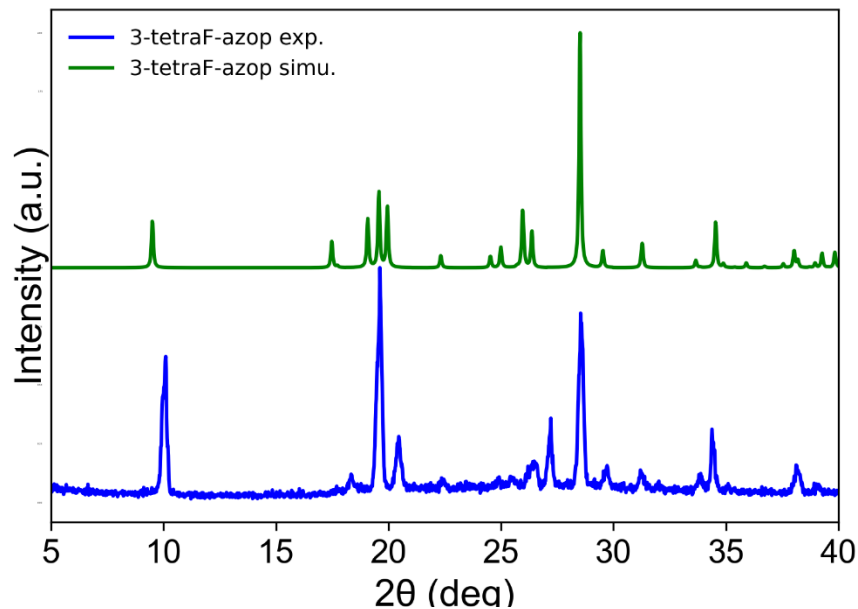

**Figure S11.** Powder X-ray diffractograms of **tetraF-azop** simulated from single crystal data (top) and experimental (bottom).

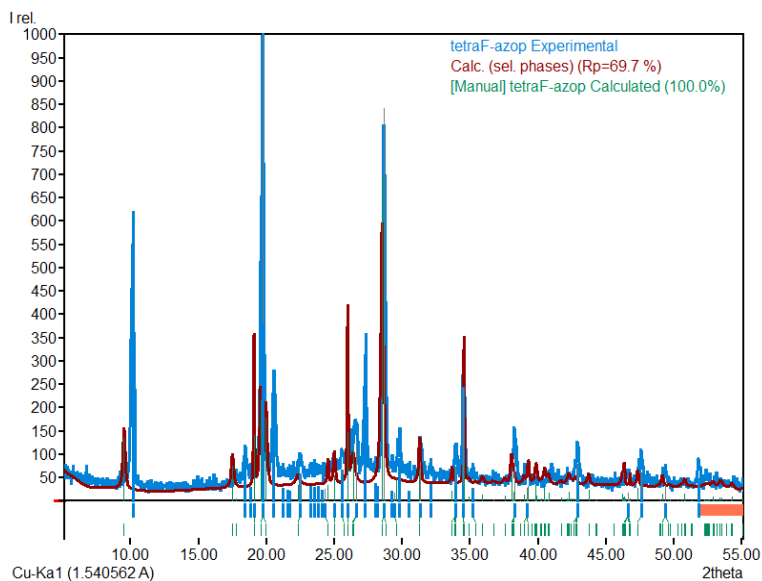

**Figure S12.** Phase composition analysis of **tetraFazop** using experimental and simulated from single crystal data. Phase analysis was carried out using Match! software using profile fitting.<sup>6</sup>



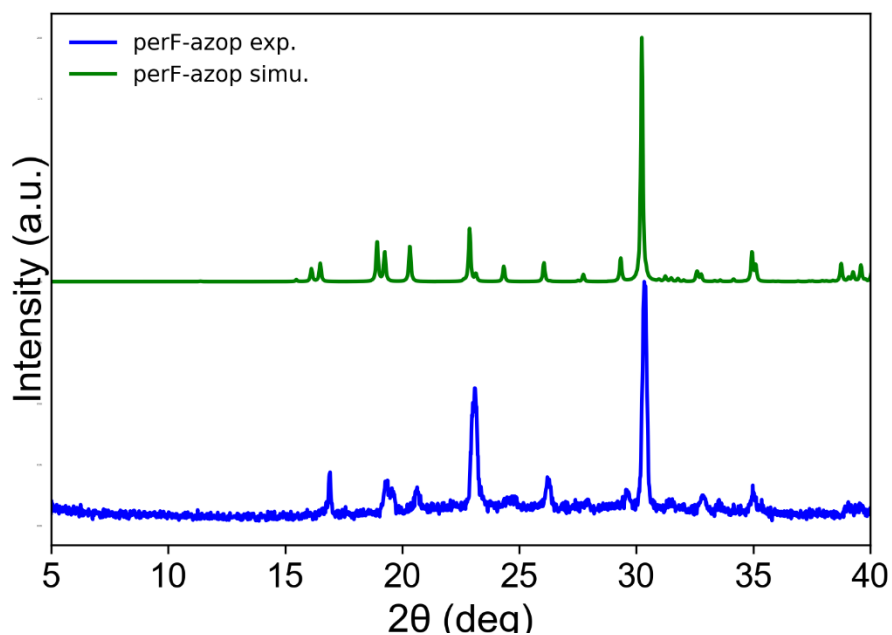

**Figure S13.** Powder X-ray diffractograms of **perF-azop** simulated from single crystal data (top) and experimental (bottom).

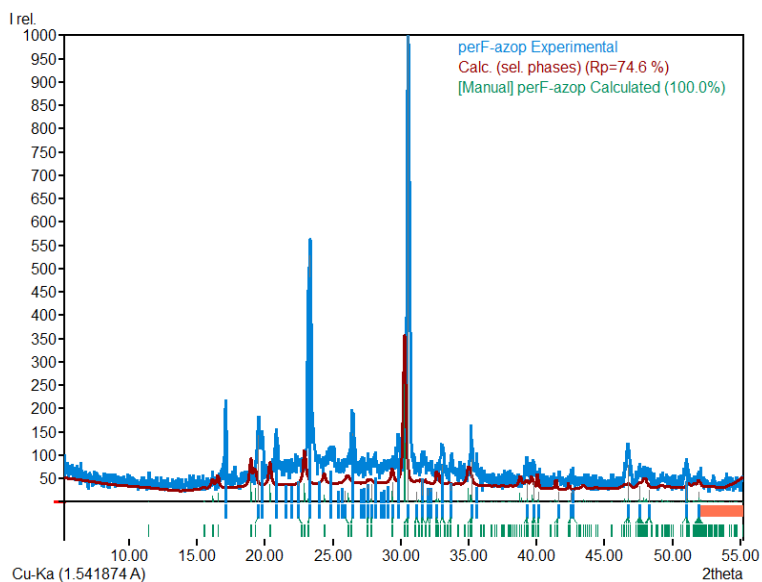

**Figure S14.** Phase composition analysis of **perF-azop** using experimental and simulated from single crystal data. Phase analysis was carried out using Match! software using profile fitting.<sup>6</sup>

## S4. NMR Spectra

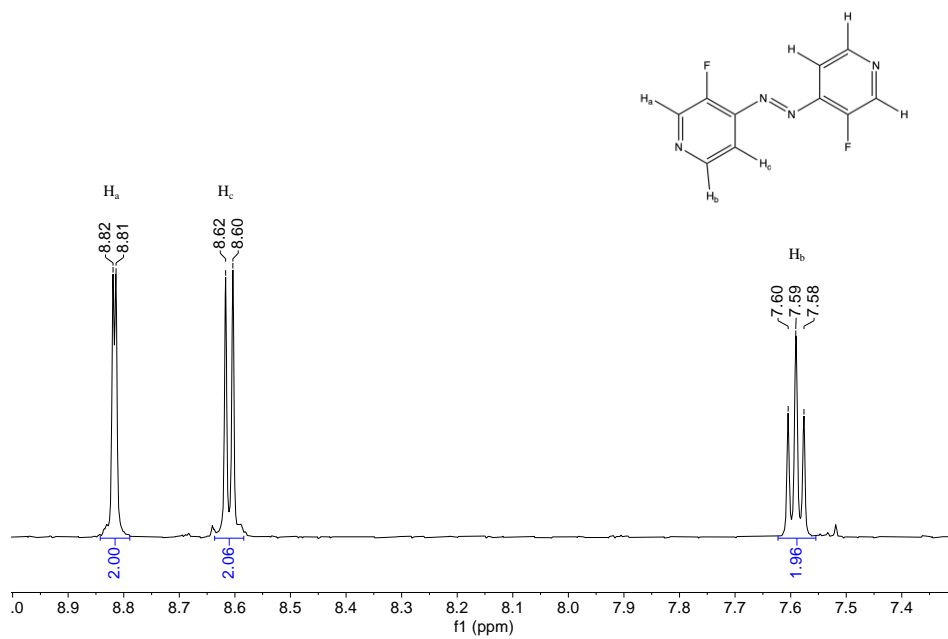

Figure S15. <sup>1</sup>H NMR spectra of diF-azop (400 MHz, CDCl<sub>3</sub>).

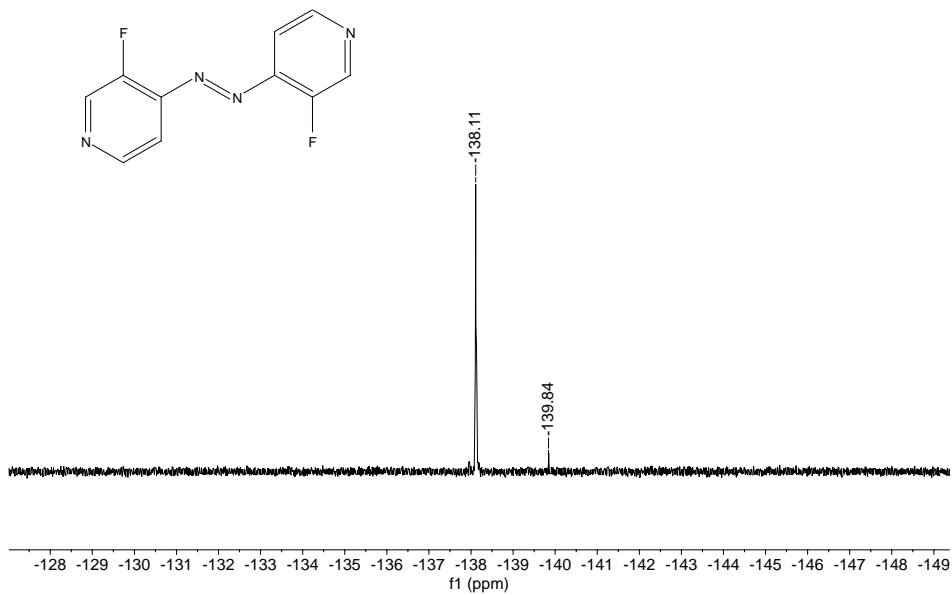

Figure S16. <sup>19</sup>F NMR spectra of diF-azop (400 MHz, CDCl<sub>3</sub>).

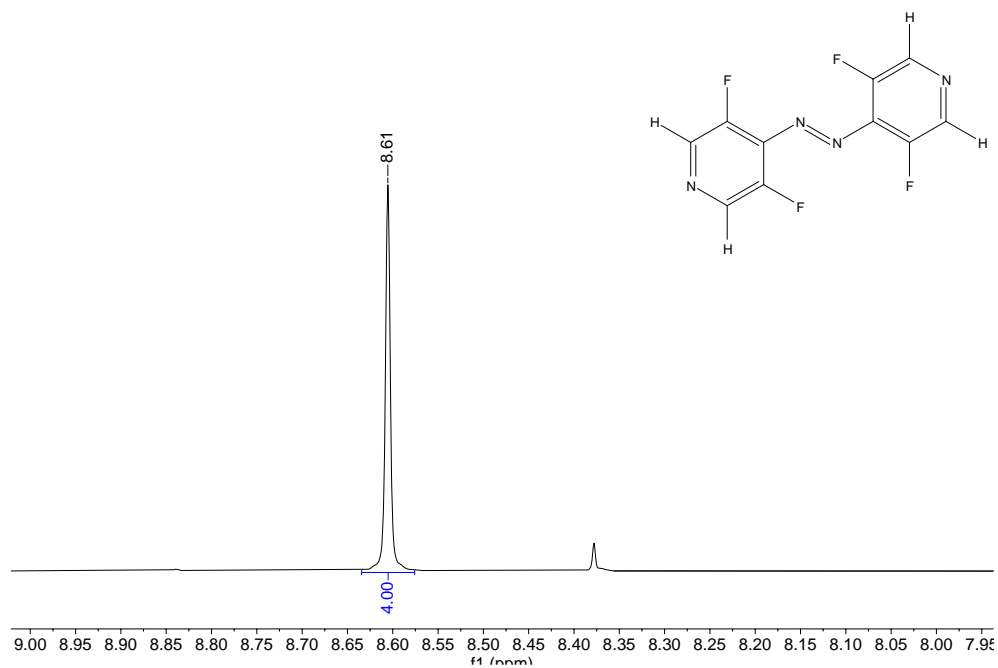

**Figure S17.** <sup>1</sup>H NMR spectra of **tetraF-azop** (400 MHz, CDCl<sub>3</sub>).

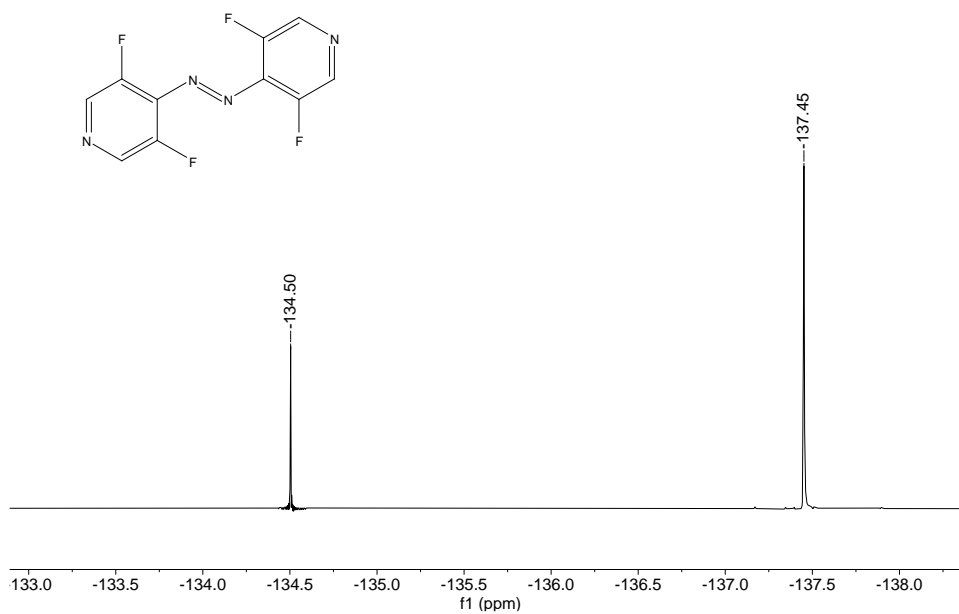

**Figure S18.** <sup>19</sup>F NMR spectra of **tetraF-azop** (400 MHz, CDCl<sub>3</sub>).

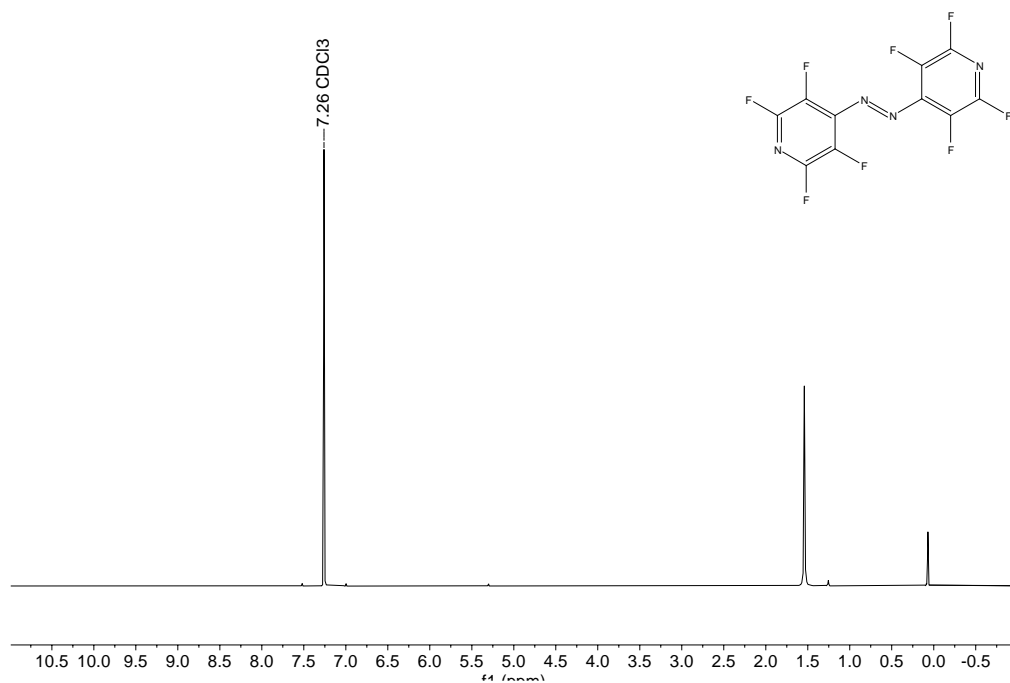

**Figure S19.** <sup>1</sup>H NMR spectra of perF-azop (400 MHz, CDCl<sub>3</sub>).

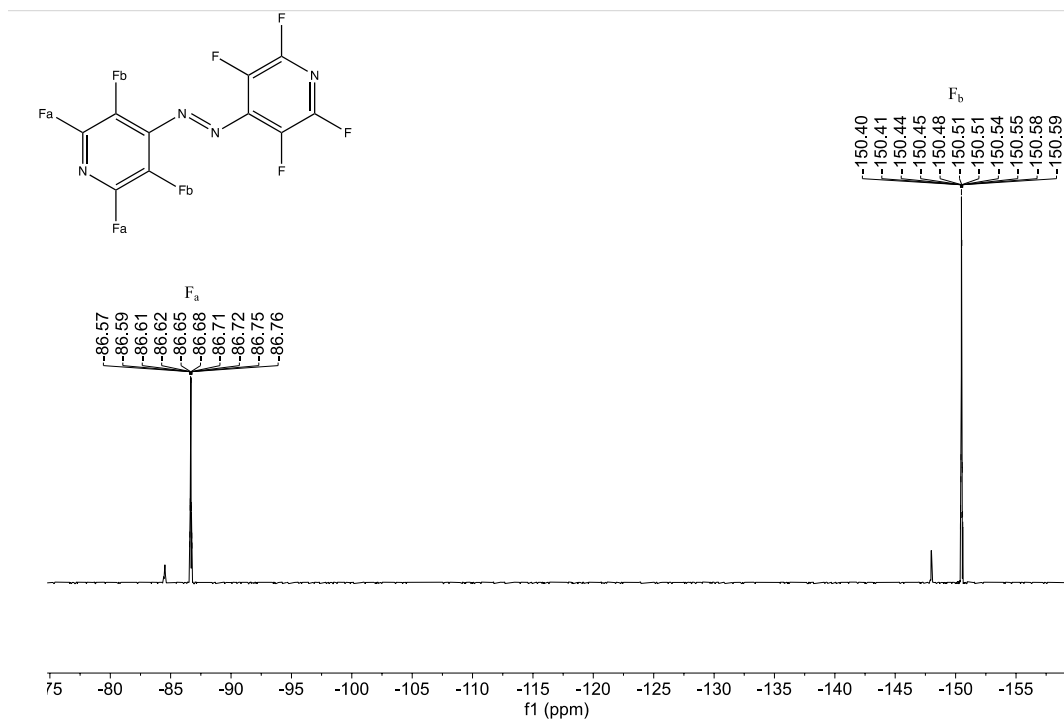

**Figure S20.** <sup>19</sup>F NMR spectra of perF-azop (400 MHz, CDCl<sub>3</sub>).

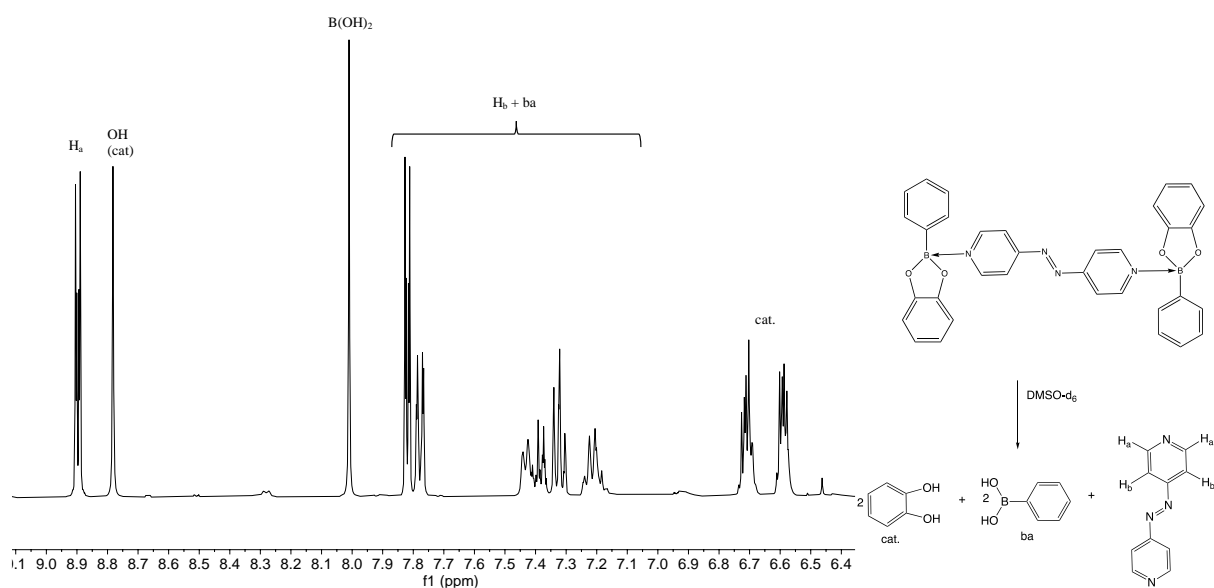

**Figure S21.**  $^1\text{H}$  NMR spectra of  $(\text{PhBE})\cdot(\text{azop})$  (400 MHz,  $\text{DMSO-}d_6$ ). We note the adduct dissociated in solution.

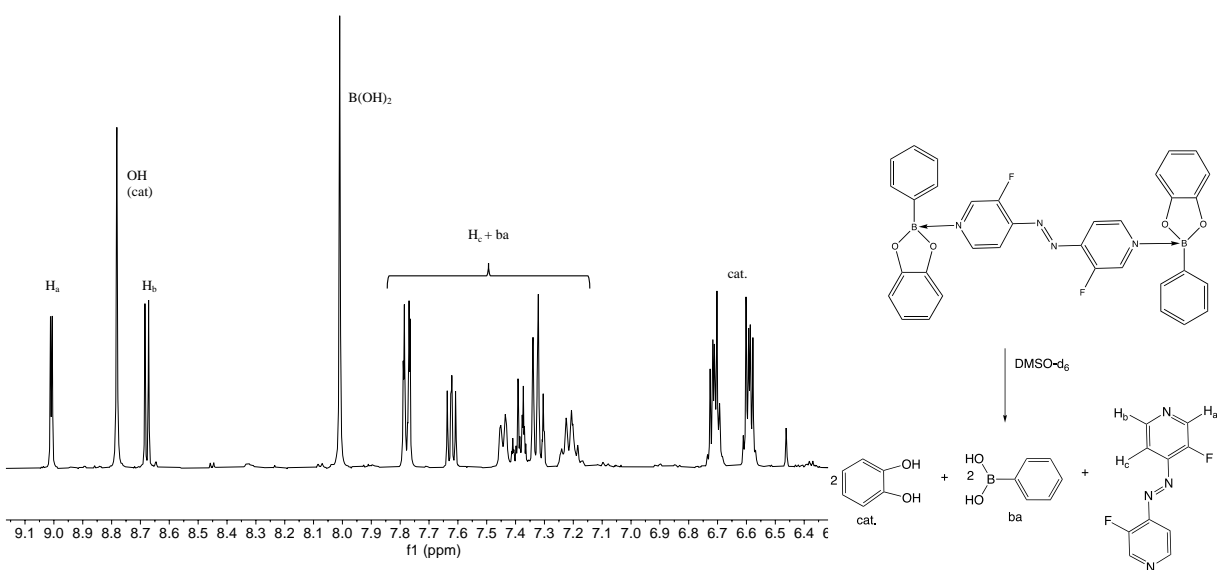

**Figure S22.**  $^1\text{H}$  NMR spectra of  $(\text{PhBE})\cdot(\text{diF-azop})$  (400 MHz,  $\text{DMSO-}d_6$ ). We note the adduct dissociated in solution.

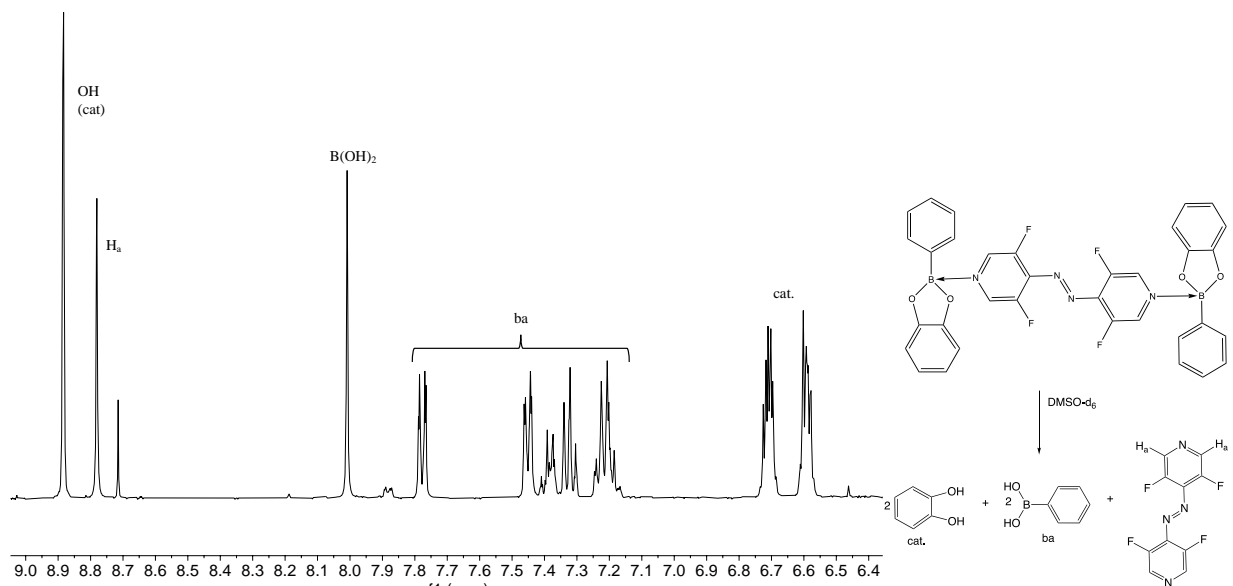

**Figure S23.**  $^1\text{H}$  NMR spectra of  $(\text{PhBE}) \cdot (\text{tetraF-azop})$  (400 MHz,  $\text{DMSO-}d_6$ ). We note the adduct dissociated in solution.

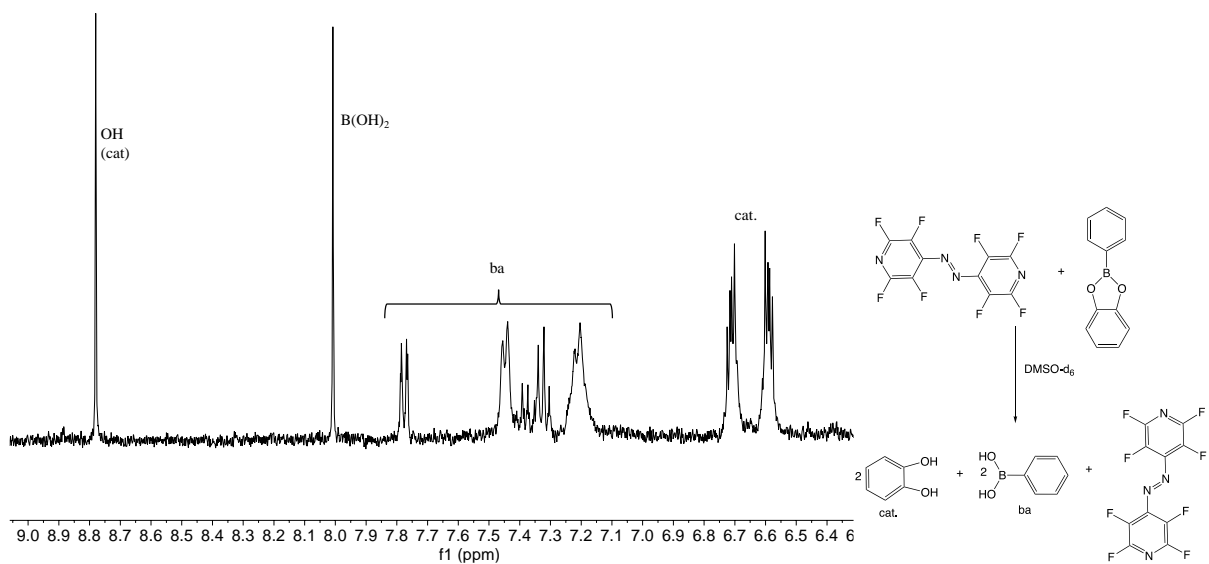

**Figure S24.**  $^1\text{H}$  NMR spectra of  $(\text{PhBE}) \cdot (\text{perF-azop})$  (400 MHz,  $\text{DMSO-}d_6$ ). We note the adduct dissociated in solution.

## S5. Hirshfeld analysis

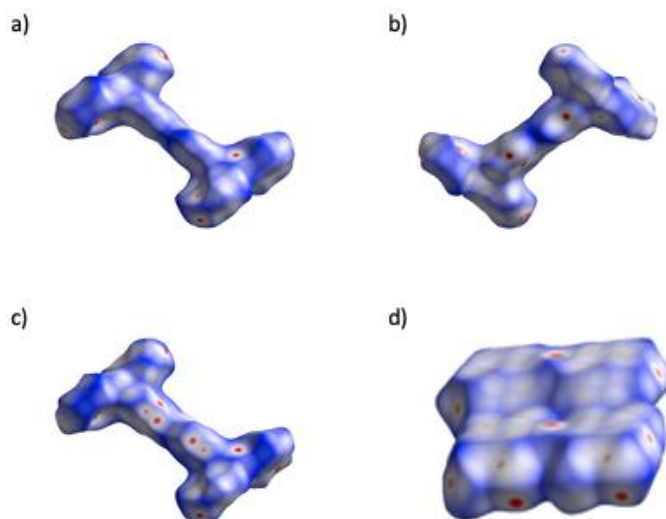

**Figure S25.** 2D Hirshfeld projections along the *a*-axis of adducts and co-crystal: a) (PhBE)·(azop), b) (PhBE)·(diF-azop), c) (PhBE)·(tetraF-azop), and d) (PhBE)·(perF-azop).

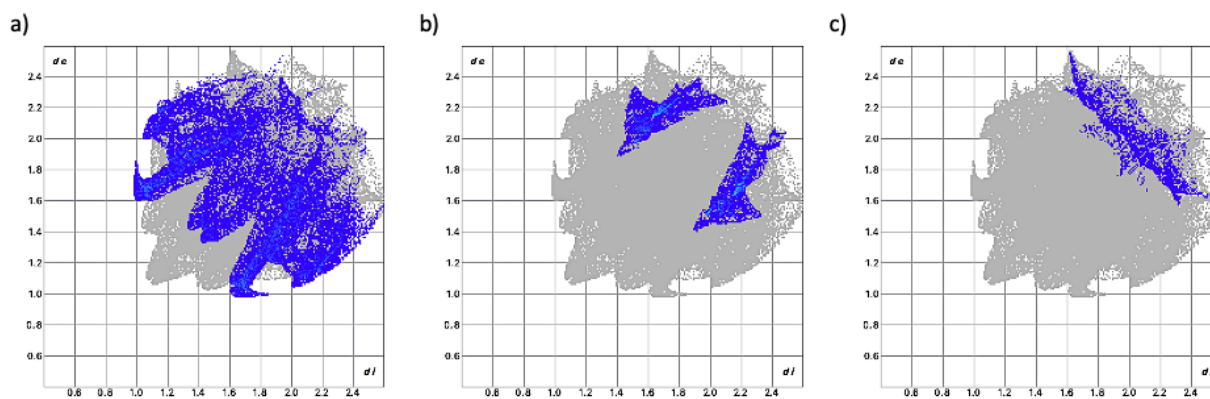

**Figure S26.** Selected Hirshfeld projection interactions for (PhBE)·(azop) structure: a) C-C interactions, b) C-H interactions, and c) N-H interactions.

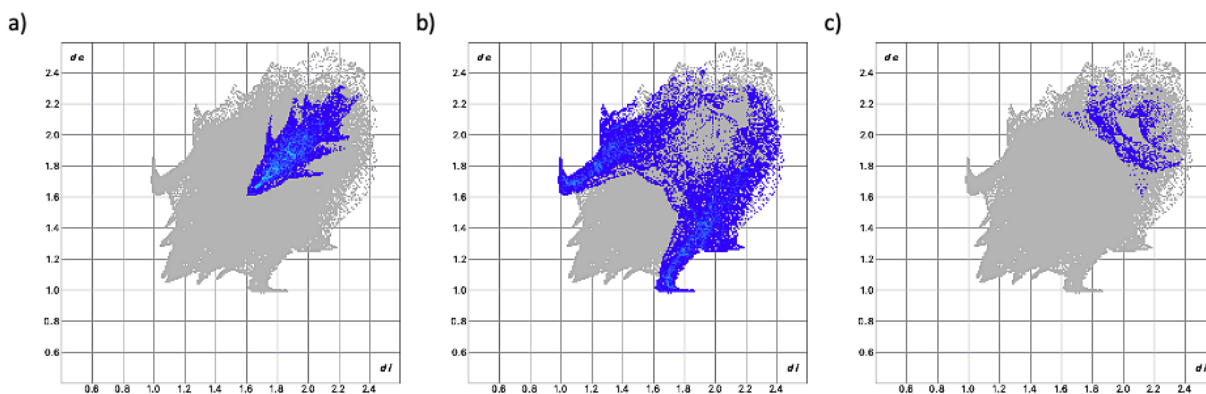

**Figure S27.** Selected Hirshfeld projection interactions for **(PhBE)·(diFazop)** structure: a) C-C interactions, b) C-H interactions, and c) N-H interactions.

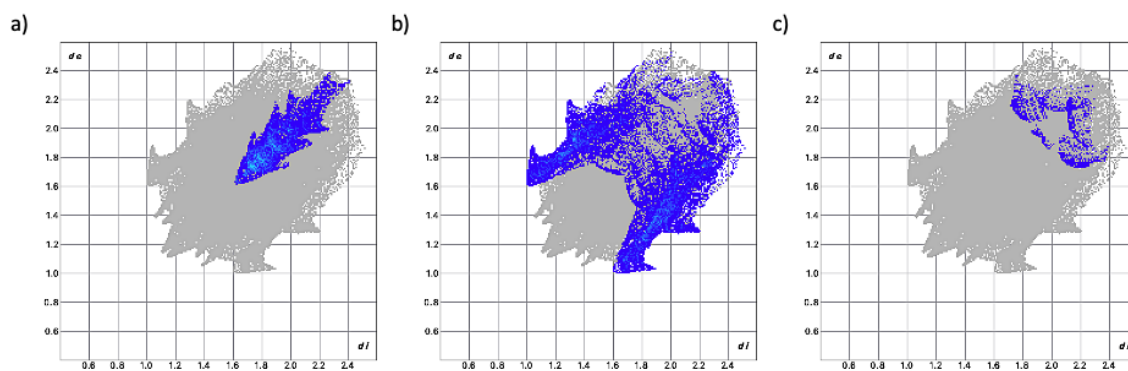

**Figure S28.** Selected Hirshfeld projection interactions for **(PhBE)·(tetraF-azop)** structure: a) C-C interactions, b) C-H interactions, and c) N-H interactions.

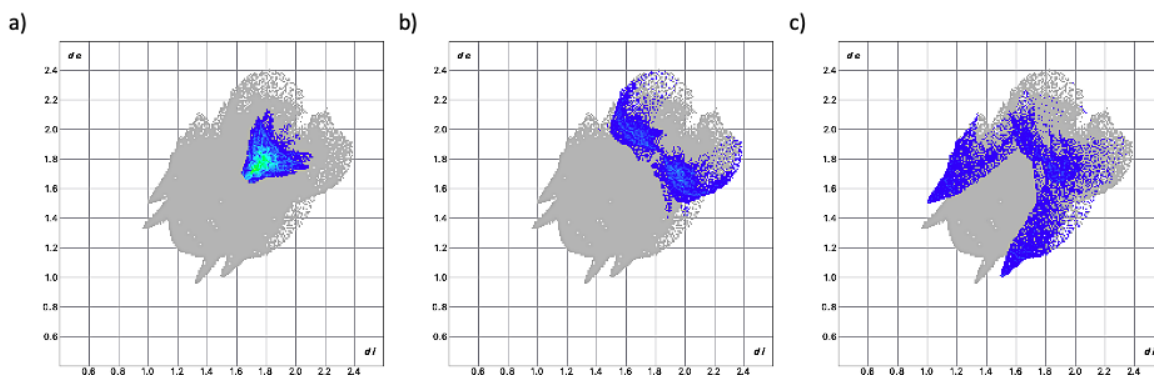

**Figure S29.** Selected Hirshfeld projection interactions for **(PhBE)·(perF-azop)** structure: a) C-C interactions, b) C-H interactions, and c) N-H interactions.



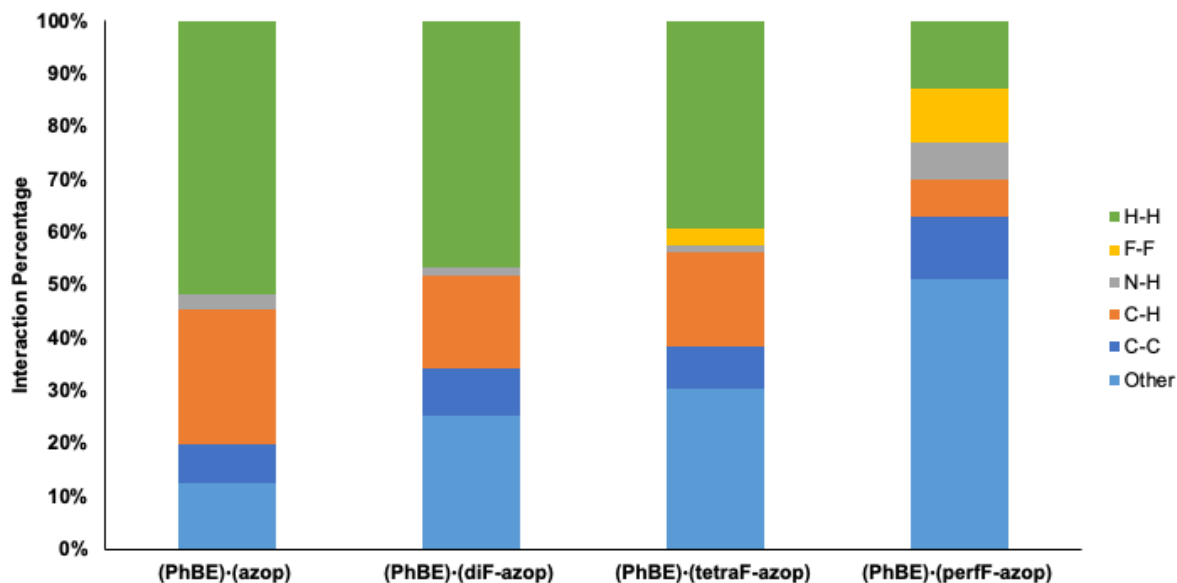

**Table S8.** Selected projection interaction percentages of the reported cocystal structures.

## References

1. N. Iranpoor, H. Firouzabadi, D. Khalili and S. Motevalli, *J. Org. Chem.*, 2008, **73**, 4882-4887.
2. G. M. Sheldrick, *Acta Cryst. A*, 2015, **71**, 3-8.
3. G. M. Sheldrick, *Acta Cryst. C*, 2015, **71**, 3-8.
4. O. V. Dolomanov, L. J. Bourhis, R. J. Gildea, J. A. Howard and H. Puschmann, *J. Appl. Crystallogr.*, 2009, **42**, 339-341.
5. (a) J.-D. Chai and M. Head-Gordon, *Phys. Chem. Chem. Phys.*, 2008, **10**, 6615-6620; (b) Y. K. Kang and H. S. Park, *Chem. Phys. Lett.*, 2014, **600**, 112-117.
6. H. Putz and K. Brandenburg GbR, Match! - Phase Analysis using Powder Diffraction (version Version 3) Crystal Impact, Kreuzherrenstr. 102 53227 Bonn, Germany.
